# Supplementary material for: Antioxidant and Cytotoxic Activities of Kudzu Roots and Soy Molasses against Pediatric Tumors and Phytochemical Analysis of Isoflavones Using HPLC-DAD-ESI-HRMS
Source: MDPI journal article supplement (doi:10.3390/plants11060741), 2022-03-10
Supplement: s1 [file s1]

## Article

# Antioxidant and Cytotoxic Activities of Kudzu Roots and Soy Molasses against Pediatric Tumors and Phytochemical Analysis of Isoflavones Using HPLC-DAD-ESI-HRMS

Saied A. Aboushanab <sup>1,2,\*</sup>, Vadim A. Shevyrin <sup>1,2</sup>, Grigory P. Slesarev <sup>1,2</sup>, Vsevolod V. Melekhin <sup>2,3,4</sup>, Anna V. Shcheglova <sup>2,3</sup>, Oleg G. Makeev <sup>3,4</sup>, Elena G. Kovaleva <sup>1,2</sup> and Ki Hyun Kim <sup>5,\*</sup>

<sup>1</sup> Institute of Chemical Engineering, Ural Federal University Named after the First President of Russia B. N. Yeltsin, Mira 19, 620002 Yekaterinburg, Russia; vadim.shevyrin@gmail.com (V.A.S.); grix2000@yandex.ru (G.P.S.); e.g.kovaleva@urfu.ru (E.G.K.)

<sup>2</sup> Innovative Center of Chemical and Pharmaceutical Technologies, Laboratory of Organic Synthesis, Ural Federal University Named after the First President of Russia B. N. Yeltsin, Mira 19, 620002 Yekaterinburg, Russia; melekhinvv@mail.ru (V.V.M.); ann257goldfinch@gmail.com (A.V.S.)

<sup>3</sup> Department of Biology, Ural State Medical University, Repina 3, 620014 Yekaterinburg, Russia; larim@mail.ru

<sup>4</sup> Department of Gene and Cell Therapy, Institute for Medical Cell Technologies, Karla Marksa 22a, 620026 Yekaterinburg, Russia

<sup>5</sup> School of Pharmacy, Sungkyunkwan University, Suwon 16419, Korea

\* Correspondence: sabushanab@urfu.ru (S.A.A.); khkim83@skku.edu (K.H.K.); Tel.: +82-31-290-7700 (K.H.K.)

## Supporting Information

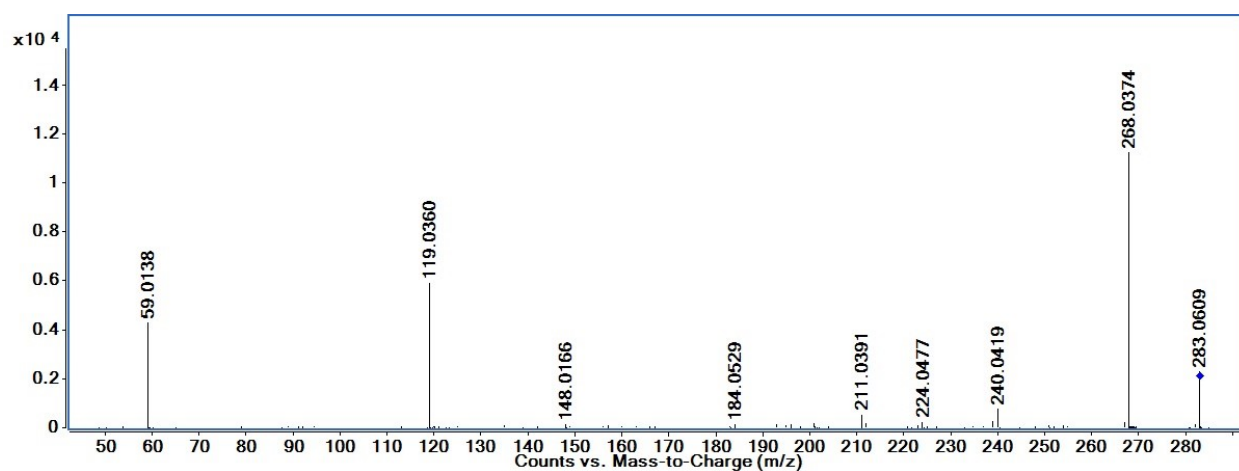Figure S1. CID spectrum of compound 6 ( $C_{16}H_{12}O_5$ ) ( $[M-H]^- = 283.0612$ , CE = 20 eV)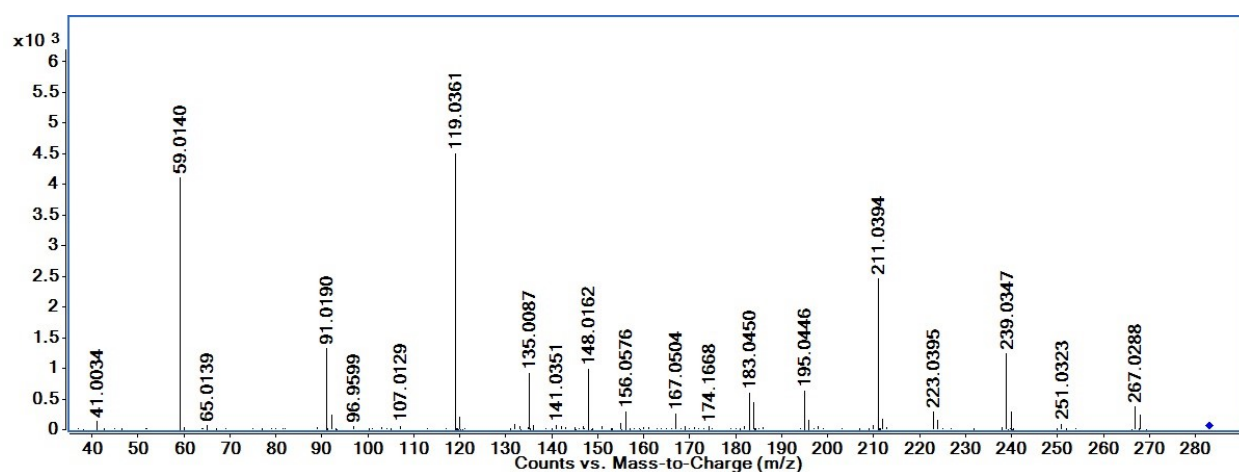Figure S2. CID spectrum of compound 6 ( $C_{16}H_{12}O_5$ ) ( $[M-H]^- = 283.0612$ , CE = 40 eV)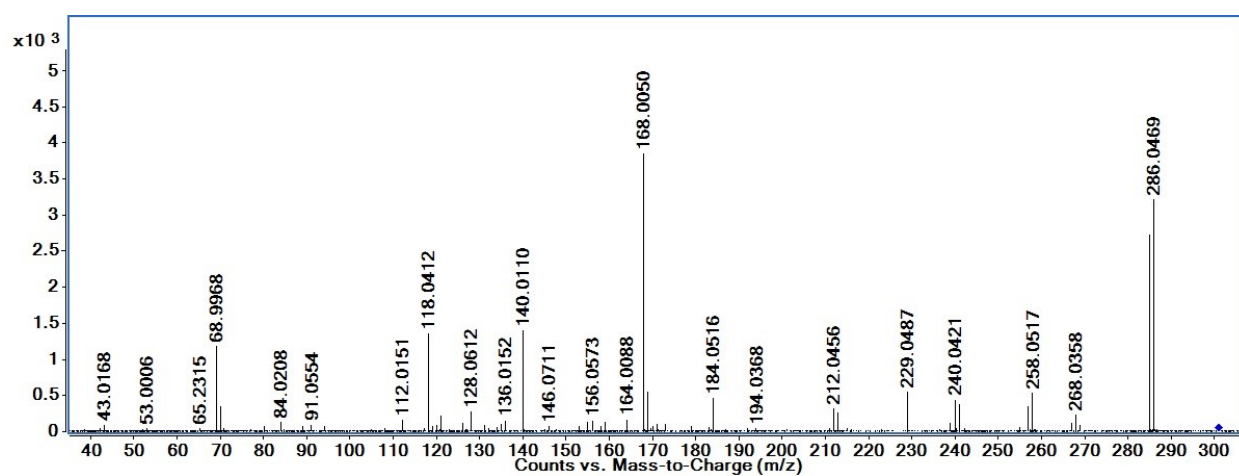Figure S3. CID spectrum of compound 8 ( $C_{16}H_{12}O_6$ , tectorigenin) ( $[M+H]^+ = 301.0707$ , CE = 40 eV)

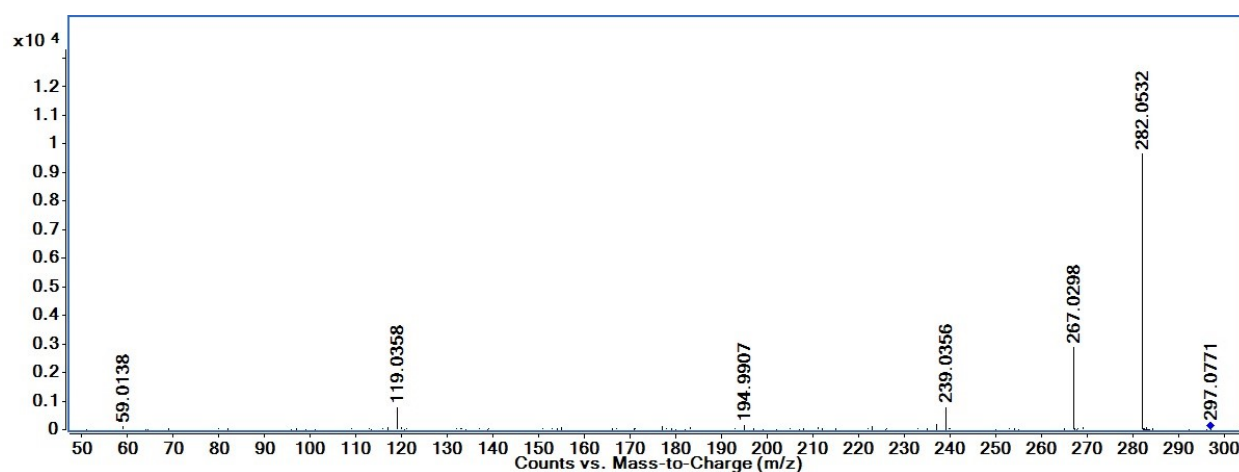

Figure S4. CID spectrum of compound 9 ( $C_{17}H_{14}O_5$ ) ( $[M-H]^- = 297.0768$ , CE = 20 eV)

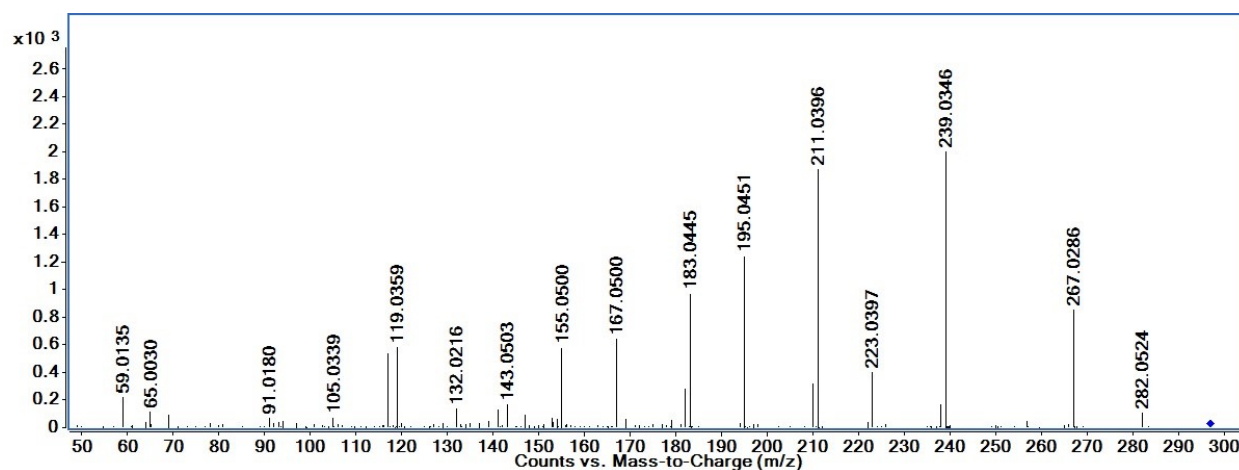

Figure S5. CID spectrum of compound 9 ( $C_{17}H_{14}O_5$ ) ( $[M-H]^- = 297.0768$ , CE = 40 eV)

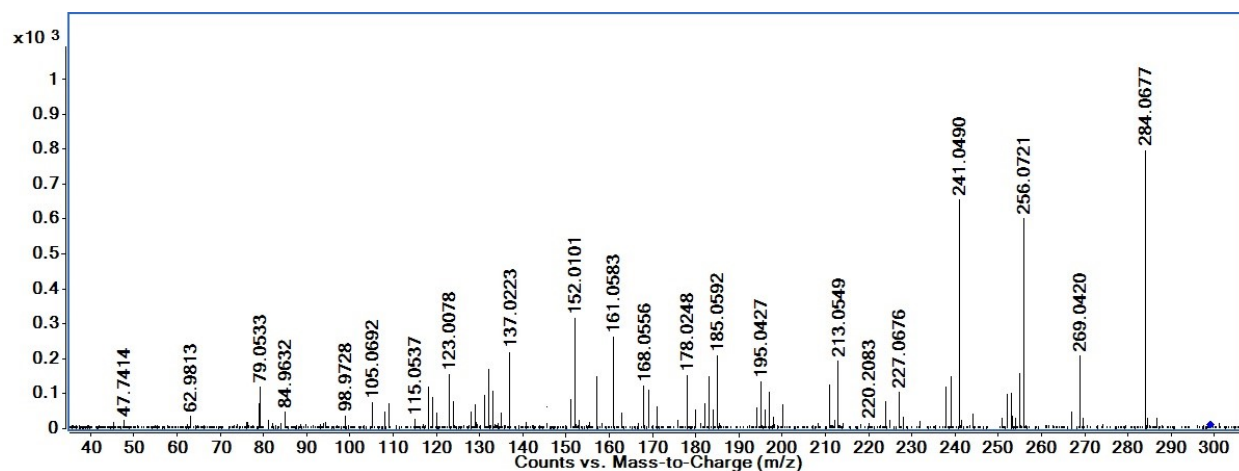

Figure S6. CID spectrum of compound 9 ( $C_{17}H_{14}O_5$ ) ( $[M+H]^+ = 299.0914$ , CE = 40 eV)

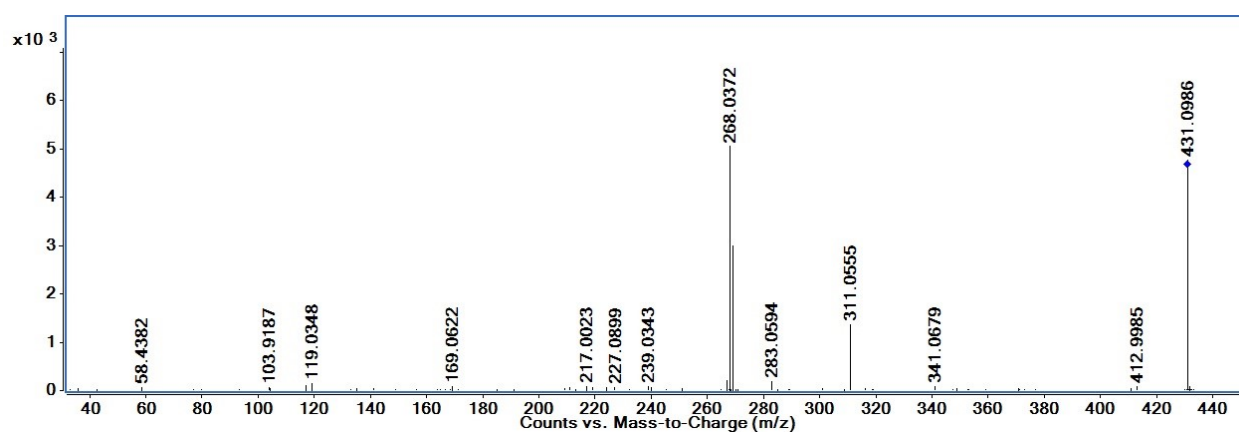

Figure S7. CID spectrum of compound 3 ( $C_{21}H_{20}O_{10}$ , genistein-7-*O*-glucoside) ( $[M-H]^- = 431.0984$ , CE = 20 eV)

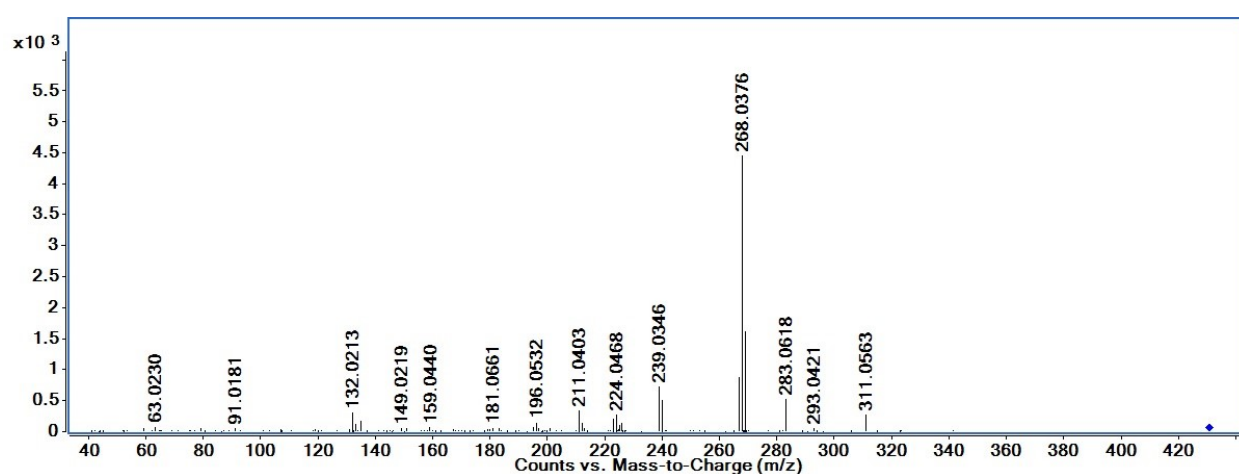

Figure S8. CID spectrum of compound 3 ( $C_{21}H_{20}O_{10}$ , genistein-7-*O*-glucoside) ( $[M-H]^- = 431.0984$ , CE = 40 eV)

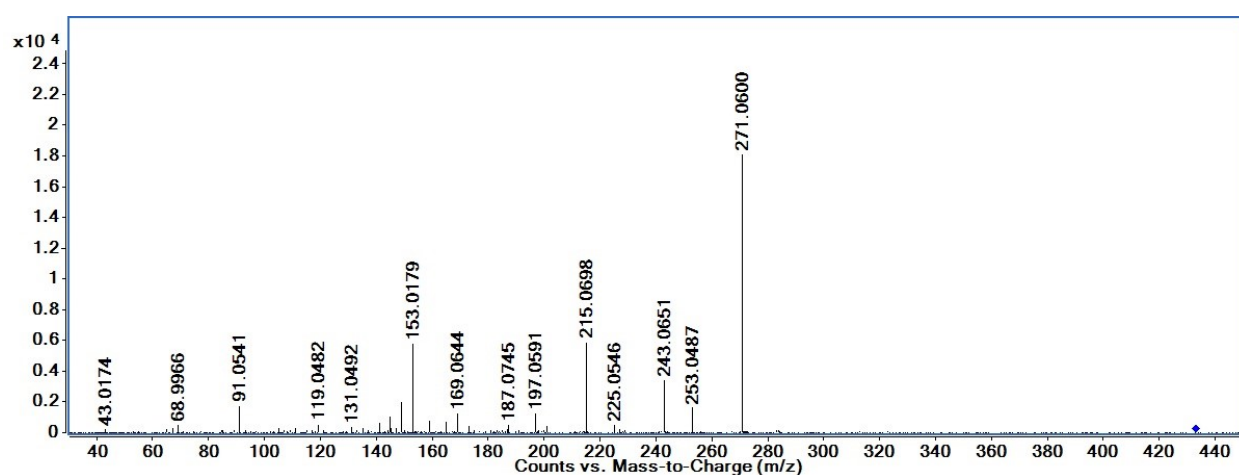

Figure S9. CID spectrum of compound 3 ( $C_{21}H_{20}O_{10}$ , genistein-7-*O*-glucoside) ( $[M+H]^+ = 433.1129$ , CE = 50 eV)

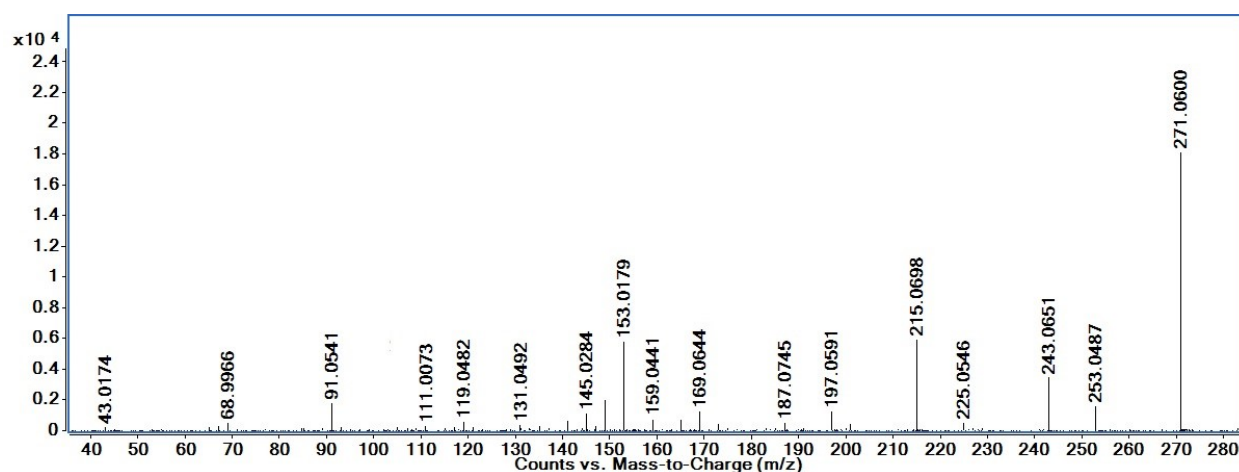

Figure S10. Fragment of CID spectrum of compound 3 ( $C_{21}H_{20}O_{10}$ , genistein-7-*O*-glucoside) ( $[M+H]^+ = 433.1129$ , CE = 50 eV)

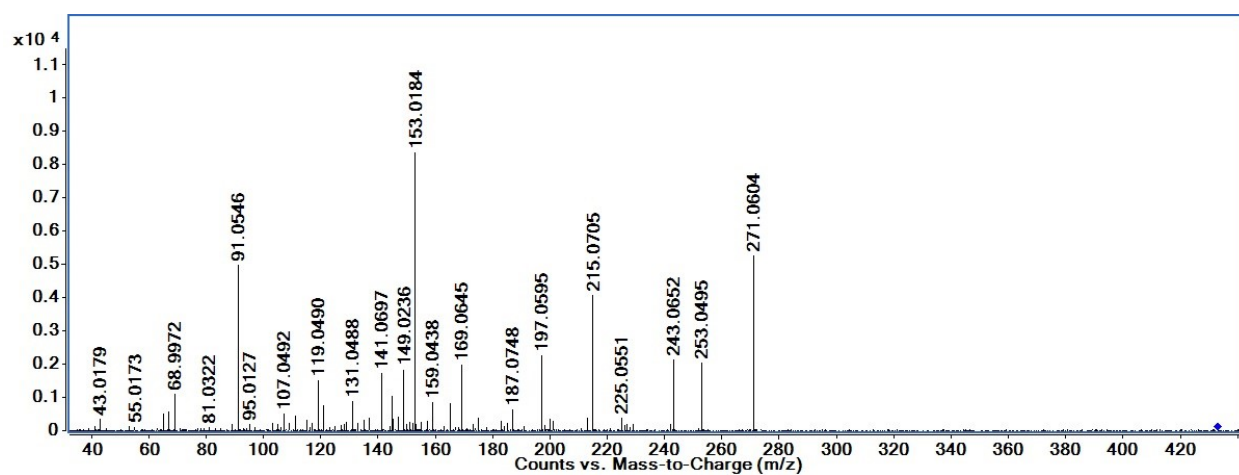

Figure S11. CID spectrum of compound 3 ( $C_{21}H_{20}O_{10}$ , genistein-7-*O*-glucoside) ( $[M+H]^+ = 433.1129$ , CE = 60 eV)

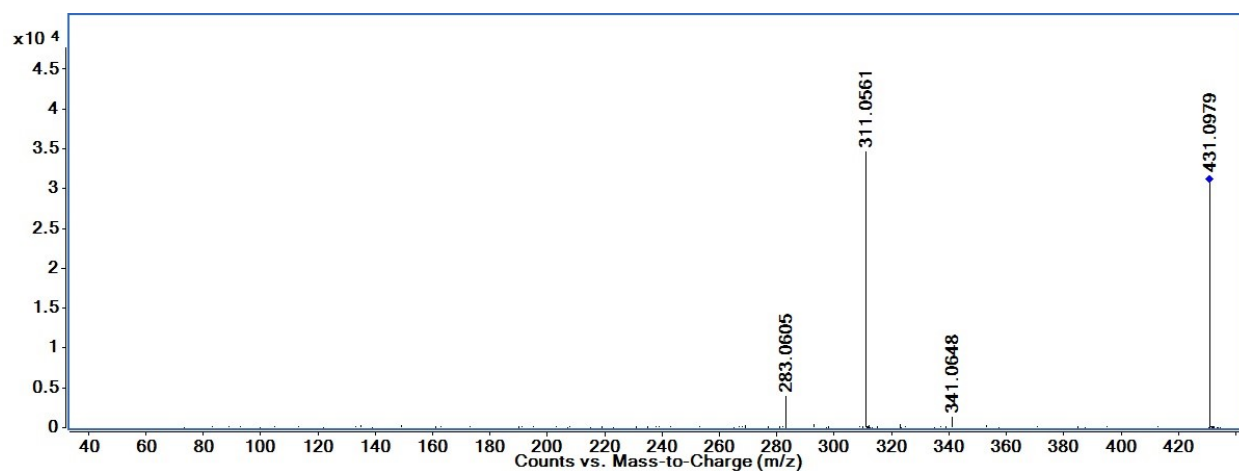

Figure S12. CID spectrum of compound 2 ( $C_{21}H_{20}O_{10}$ , genistein-8-*C*-glucoside) ( $[M-H]^- = 431.0984$ , CE = 20 eV)

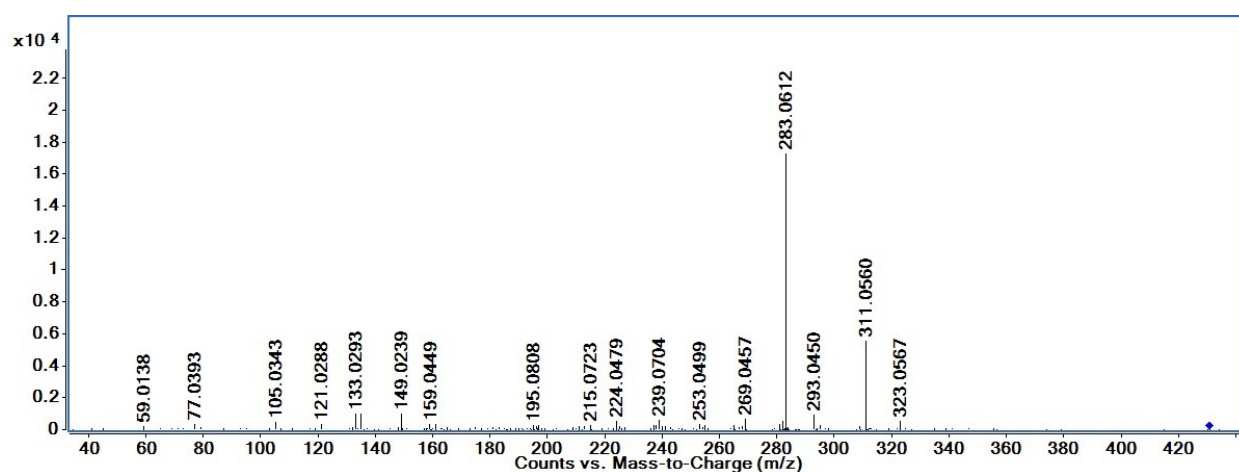

Figure S13. CID spectrum of compound 2 ( $C_{21}H_{20}O_{10}$ , genistein-8-C-glucoside) ( $[M-H]^- = 431.0984$ , CE = 40 eV)

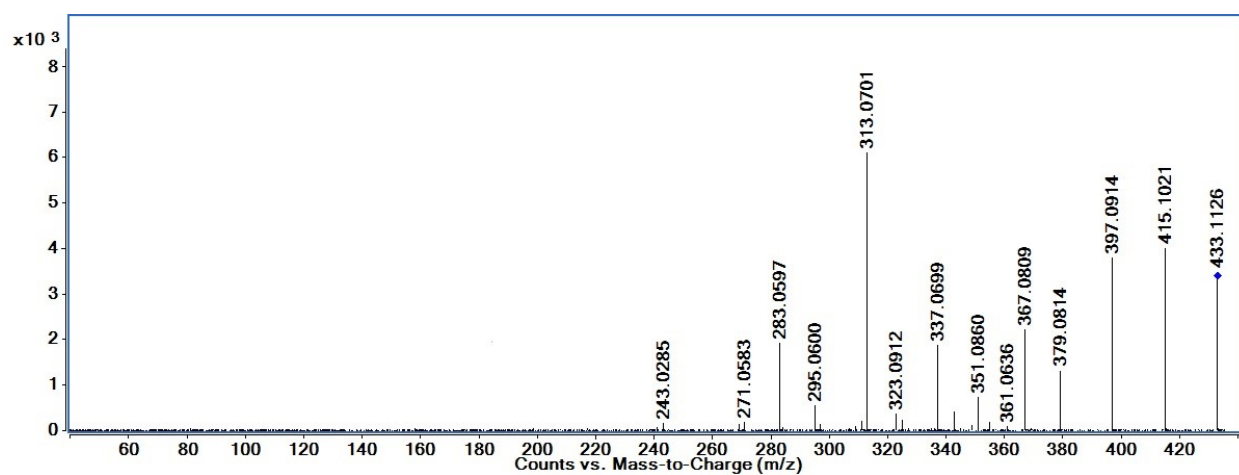

Figure S14. CID spectrum of compound 2 ( $C_{21}H_{20}O_{10}$ , genistein-8-C-glucoside) ( $[M+H]^+ = 433.1129$ , CE = 20 eV)

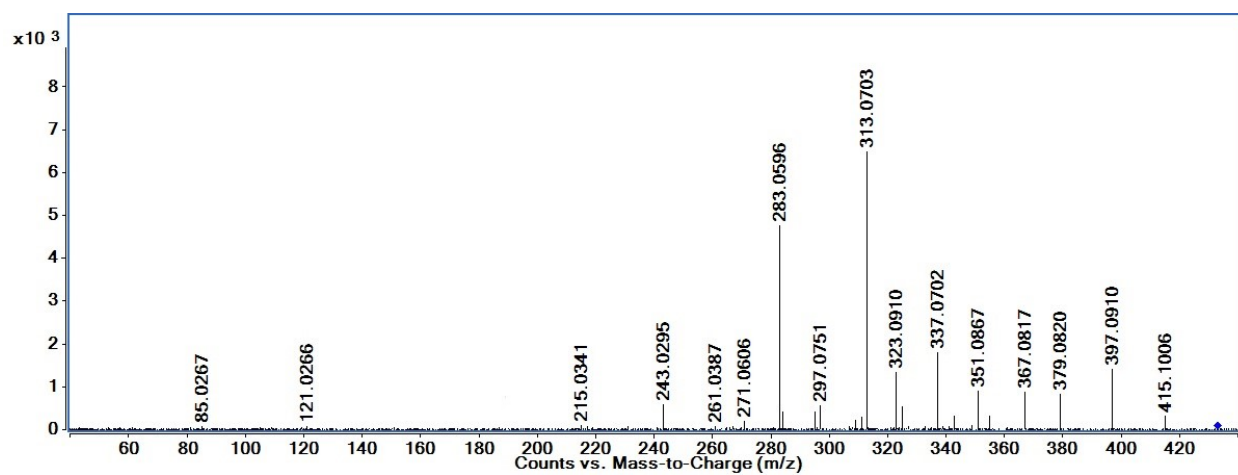

Figure S15.

CID spectrum of compound 2 ( $C_{21}H_{20}O_{10}$ , genistein-8-C-glucoside) ( $[M+H]^+ = 433.1129$ , CE = 30 eV)



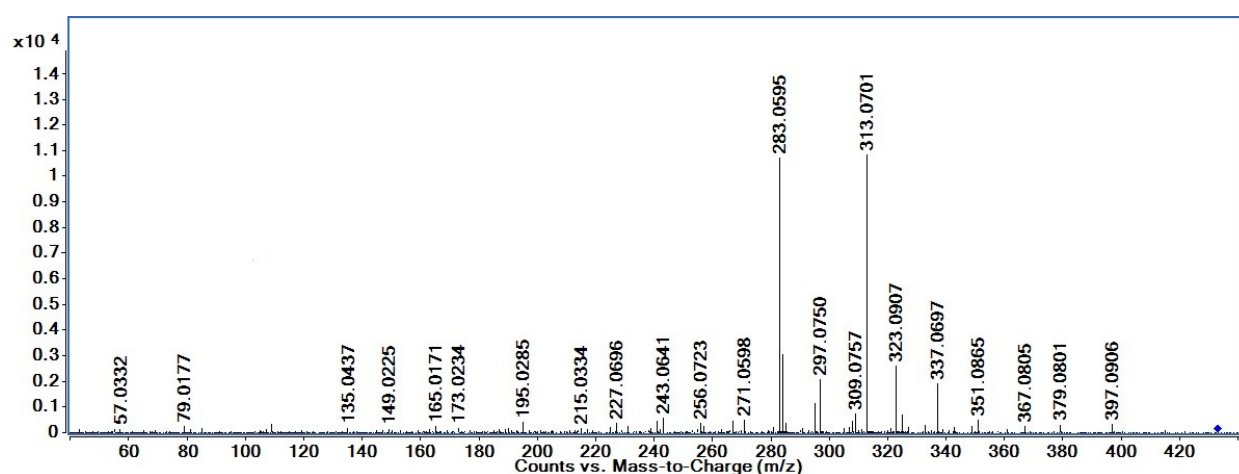

Figure S16. CID spectrum of compound 2 ( $C_{21}H_{20}O_{10}$ , genistein-8-C-glucoside) ( $[M+H]^+ = 433.1129$ , CE = 40 eV)

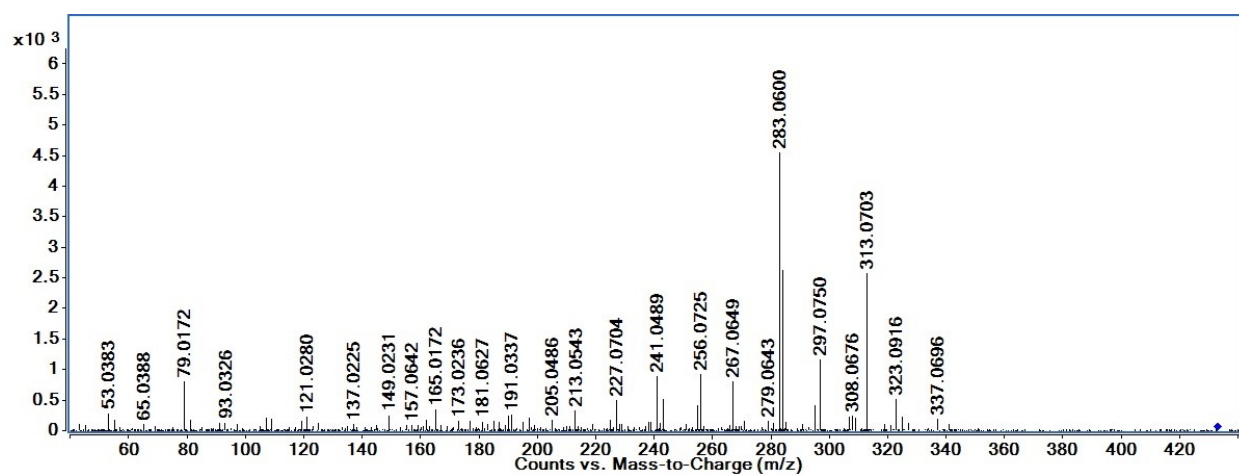

Figure S17. CID spectrum of compound 2 ( $C_{21}H_{20}O_{10}$ , genistein-8-C-glucoside) ( $[M+H]^+ = 433.1129$ , CE = 50 eV)

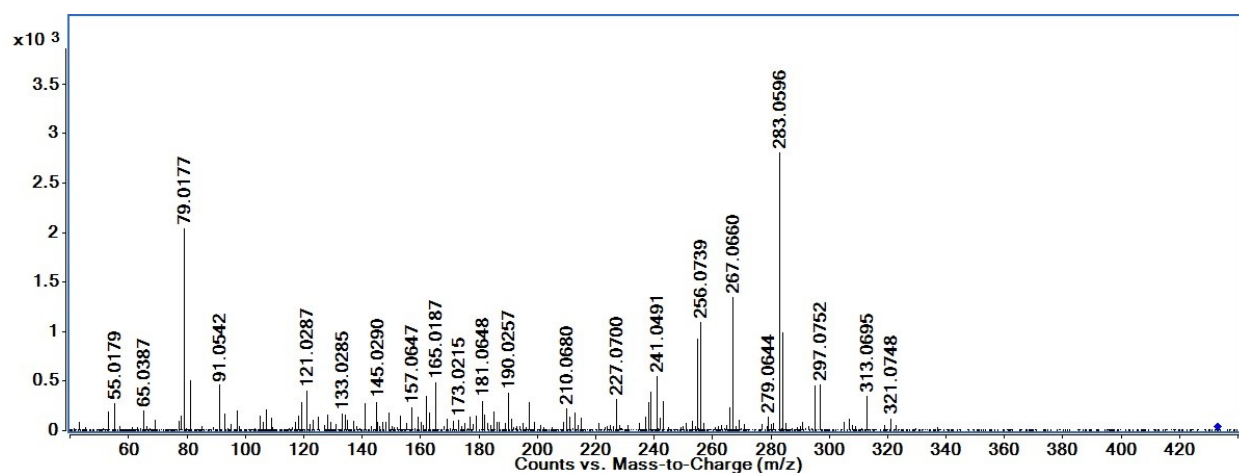

Figure S18. CID spectrum of compound 2 ( $C_{21}H_{20}O_{10}$ , genistein-8-C-glucoside) ( $[M+H]^+ = 433.1129$ , CE = 60 eV)
